# Supplementary material for: Oscillatory movement of a dynein-microtubule complex crosslinked with DNA origami
Source: eLife. 2022 Jun 24;11:e76357. doi: 10.7554/eLife.76357 (PMC9232216; doi:10.7554/eLife.76357)
Supplement: Figure 2—source data 1. [file elife-76357-fig2-data1.xlsx]

## Sheet: 02A_096_097_098_P_low
Numerical data for Figure 2 - figure supplement 4 - distribution of the averaged lengths of MT-bound dynein molecules
ATP		x1	y1	x2	y2	x3	y3	x4	y4		Width [pix]	Width [nm]
Averaged image #1	Group #1	112	145	264.333	145	264.333	251	112	251		152.333	33.4067
Averaged image #1	Group #2	137.333	149.333	268.333	149.333	268.333	242	137.333	242		131	28.7283
Averaged image #2	Group #1	106.333	155.333	258.667	155.333	258.667	240.667	106.333	240.667		152.333	33.4067
Averaged image #2	Group #2	120.667	146.333	260.667	146.333	260.667	235.333	120.667	235.333		140	30.702
Averaged image #3	Group #1	116	150	272.333	150	272.333	258.667	116	258.667		156.333	34.2839
Averaged image #3	Group #2	108	144.333	272.333	144.333	272.333	249.333	108	249.333		164.333	36.0383
Averaged image #4	Group #1	112	151	261	151	261	256.333	112	256.333		149	32.6757
Averaged image #4	Group #2	130.667	158.333	269.333	158.333	269.333	240.333	130.667	240.333		138.667	30.4096
Averaged image #5	Group #1	118.333	156	268	156	268	250	118.333	250		149.667	32.8219
Averaged image #5	Group #2	121.333	147.333	272.333	147.333	272.333	244.333	121.333	244.333		151	33.1143
Averaged image #6	Group #1	115	154.333	265.333	154.333	265.333	253	115	253		150.333	32.9681
Averaged image #6	Group #2	119.333	140	281	140	281	248.333	119.333	248.333		161.667	35.4535
Averaged image #7	Group #1	113.333	153.667	270	153.667	270	259.667	113.333	259.667		156.667	34.357
Averaged image #7	Group #2	102	146.333	274	146.333	274	241.333	102	241.333		172	37.7196
Averaged image #8	Group #1	110.333	151.667	273.667	151.667	273.667	257.667	110.333	257.667		163.333	35.819
Averaged image #8	Group #2	103	149.333	279.667	149.333	279.667	254	103	254		176.667	38.743
										avg	154.083	33.7905
										stdev	11.9297	2.61619
Apo
Averaged image #1	Group #1	141.667	150.667	250.667	150.667	250.667	255	141.667	255		109	23.9037
Averaged image #1	Group #2	104	144	242	144	242	251.333	104	251.333		138	30.2634
Averaged image #2	Group #1	116	154	269.667	154	269.667	261.667	116	261.667		153.667	33.6991
Averaged image #2	Group #2	123	138.667	255	138.667	255	249.333	123	249.333		132	28.9476
Averaged image #3	Group #1	126	150.333	273	150.333	273	262.333	126	262.333		147	32.2371
Averaged image #3	Group #2	113	148.667	257.667	148.667	257.667	247.667	113	247.667		144.667	31.7254
Averaged image #4	Group #1	115.667	156	251	156	251	257.333	115.667	257.333		135.333	29.6786
Averaged image #4	Group #2	119.667	140	250	140	250	253	119.667	253		130.333	28.5821
Averaged image #5	Group #1	119	152	268	152	268	257	119	257		149	32.6757
Averaged image #5	Group #2	104.667	148	225.667	148	225.667	248	104.667	248		121	26.5353
Averaged image #6	Group #1	130	156.667	249.333	156.667	249.333	248	130	248		119.333	26.1698
Averaged image #6	Group #2	124.667	145.333	264.333	145.333	264.333	244	124.667	244		139.667	30.6289
Averaged image #7	Group #1	127.667	150.333	259.333	150.333	259.333	252.333	127.667	252.333		131.667	28.8745
Averaged image #7	Group #2	118.333	143.667	262.667	143.667	262.667	252.667	118.333	252.667		144.333	31.6523
Averaged image #8	Group #1	137	152	265.333	152	265.333	253	137	253		128.333	28.1435
Averaged image #8	Group #2	115.667	146	256.333	146	256.333	255.333	115.667	255.333		140.667	30.8482
Averaged image #9	Group #1	121	145.667	256.333	145.667	256.333	262.333	121	262.333		135.333	29.6786
Averaged image #9	Group #2	128.333	141	264.333	141	264.333	252.333	128.333	252.333		136	29.8248
Averaged image #10	Group #1	123.333	157.667	263	157.667	263	250.667	123.333	250.667		139.667	30.6289
Averaged image #10	Group #2	118.667	140.667	253.333	140.667	253.333	254	118.667	254		134.667	29.5324
Averaged image #11	Group #1	131.667	153.333	257.333	153.333	257.333	239.667	131.667	239.667		125.667	27.5587
Averaged image #11	Group #2	126.667	146.333	259.667	146.333	259.667	253	126.667	253		133	29.1669
Averaged image #12	Group #1	123.667	150.333	253	150.333	253	260.333	123.667	260.333		129.333	28.3628
Averaged image #12	Group #2	116.333	150	260	150	260	243.667	116.333	243.667		143.667	31.5061
										avg	135.056	29.6177
										stdev	10.1232	2.22003
											t-value	6.71743e-06
