# Supplementary material for: Oscillatory movement of a dynein-microtubule complex crosslinked with DNA origami
Source: eLife. 2022 Jun 24;11:e76357. doi: 10.7554/eLife.76357 (PMC9232216; doi:10.7554/eLife.76357)
Supplement: Figure 3—source data 1. [file elife-76357-fig3-data1.xlsx]

## Sheet: Sheet1
Numerical data for Figure 3A - MT gliding velocities				Numerical data for Figure 3B - sliding of the MTs in a dynein-MT complex
Travelled distance (µm)	Time for measurement (sec)	Velocity (µm/sec)		Travelled distance (µm)	Time for measurement (sec)	Velocity (µm/sec)
2.569	1.8	1.42722		10.573	1.1	9.61182
8.898	5.4	1.64778		3.067	0.2	15.335
11.74	3	3.91333		1.555	0.4	3.8875
7.251	3.8	1.90816		2.782	0.9	3.09111
14.016	3.8	3.68842		4.884	0.3	16.28
6	2	3		13	2.5	5.2
4.897	6	0.816167		3.1	0.3	10.3333
10.477	3.8	2.75711		14.145	0.7	20.2071
8.298	2	4.149		1.238	0.2	6.19
6.505	3.8	1.71184		2.395	1.2	1.99583
8.675	3.8	2.28289		3.9	1	3.9
12.873	3.8	3.38763		1.98	0.4	4.95
3.863	3.8	1.01658		6.72	0.3	22.4
6.737	3.8	1.77289		7	0.9	7.77778
3.031	3.8	0.797632		3.059	2.9	1.05483
12.533	3.8	3.29816		2.058	7.5	0.2744
3.634	3.8	0.956316		2.983	3.3	0.903939
10.571	3.8	2.78184		4.788	3.8	1.26
6.219	3.8	1.63658		2.737	1.4	1.955
1.759	3.8	0.462895		3.133	0.9	3.48111
3.991	3.8	1.05026		2.492	1.2	2.07667
2.614	3.8	0.687895		3.776	2.6	1.45231
11.744	3.8	3.09053		2.228	2.4	0.928333
2.759	3.8	0.726053		3.941	1	3.941
2.295	3.8	0.603947		1.178	0.7	1.68286
4.596	3.8	1.20947		1.901	1.5	1.26733
3.035	3.8	0.798684		4.801	7.6	0.631711
4.645	3.8	1.22237		2.53	1	2.53
4.645	3.8	1.22237		2.605	1.1	2.36818
3.318	3.8	0.873158		4.594	9.3	0.493978
5.433	3.8	1.42974		2.532	2.3	1.10087
4.587	3.8	1.20711		2.128	1.7	1.25176
7.111	3.8	1.87132		2.432	1.4	1.73714
8.269	3.8	2.17605		2.338	3.4	0.687647
5.321	3.8	1.40026		3.177	6.4	0.496406
4.16	3.8	1.09474		1.35	0.7	1.92857
1.257	3.8	0.330789		3.295	2.8	1.17679
3.308	3.8	0.870526		7.055	5.6	1.25982
4.699	3.8	1.23658		5.314	2.4	2.21417
8.506	3.8	2.23842		2.331	0.4	5.8275
4.824	3.8	1.26947		5.015	7.2	0.696528
5.558	3.8	1.46263		1.244	2	0.622
4.454	3.8	1.17211		2.126	0.8	2.6575
3.613	3.8	0.950789		2.903	2.4	1.20958
4.715	3.8	1.24079		5.607	5.6	1.00125
6.559	3.8	1.72605		3.269	1.6	2.04312
2.958	3.8	0.778421		4.341	1.6	2.71312
4.806	3.8	1.26474		3.546	1.6	2.21625
4.413	3.8	1.16132		2.915	4.8	0.607292
5.341	3.8	1.40553		1.515	1.6	0.946875
4.733	3.8	1.24553		2.919	2.4	1.21625
6.674	3.8	1.75632		7.123	2.8	2.54393
7.118	3.8	1.87316		7.901	1.2	6.58417
2.75	3.8	0.723684		2.671	1.6	1.66937
5.789	3.8	1.52342		1.224	1.6	0.765
5.307	3.8	1.39658		2.971	1.2	2.47583
6.175	3.8	1.625		1.997	3.2	0.624062
5.502	3.8	1.44789		1.891	2	0.9455
7.808	3.8	2.05474		10.702	3.2	3.34437
2.785	3.8	0.732895		2.279	1.6	1.42437
4.377	3.8	1.15184		1.767	1.2	1.4725
3.283	3.8	0.863947		3.185	1.6	1.99062
2.818	3.8	0.741579		1.282	3.2	0.400625
3.484	3.8	0.916842		4.504	7.6	0.592632
3.399	3.8	0.894474		1.541	2	0.7705
8.932	3.8	2.35053		5.225	2	2.6125
2.526	3.8	0.664737		4.594	0.4	11.485
6.07	3.8	1.59737		23.879	1.2	19.8992
6.866	3.8	1.80684		4.892	0.4	12.23
4.246	3.8	1.11737		2.419	0.8	3.02375
6.747	3.8	1.77553		21.639	1.4	15.4564
4.159	3.8	1.09447		6.223	0.6	10.3717
4.207	3.8	1.10711		2.036	0.2	10.18
6.784	3.8	1.78526		7.76	0.4	19.4
2.826	3.8	0.743684		1.311	0.4	3.2775
5.359	3.8	1.41026		7.577	1	7.577
5.92	3.8	1.55789		15.471	1.6	9.66937
3.234	3.8	0.851053		2.364	0.8	2.955
3.216	3.8	0.846316		2.34	0.6	3.9
1.586	3.8	0.417368		5.917	2	2.9585
3.238	3.8	0.852105		6.107	1.4	4.36214
3.643	3.8	0.958684		4.926	1.8	2.73667
2.482	3.8	0.653158		6.893	1.2	5.74417
4.354	3.8	1.14579		1.824	1	1.824
5.412	3.8	1.42421		6.93	1.4	4.95
4.218	3.8	1.11		5.264	0.6	8.77333
3.906	3.8	1.02789		2.289	0.2	11.445
5.431	3.8	1.42921		0.921	0.2	4.605
4.19	3.8	1.10263		0.904	0.6	1.50667
3.949	3.8	1.03921		1.964	2.8	0.701429
3.954	3.8	1.04053		3.908	1.2	3.25667
4.773	3.8	1.25605		6.103	0.8	7.62875
5.087	3.8	1.33868		2.286	6	0.381
5.256	3.8	1.38316		2.45	0.6	4.08333
37.079	54	0.686648
8.592	14	0.613714			Average	4.40074
6.368	14.6	0.436164			N	94
14.216	35.6	0.399326			Standard error	0.515655
32.772	39	0.840308			Median	2.50292
7.985	22.2	0.359685
4.489	3.6	1.24694
14.017	21.8	0.642982
23.875	36.4	0.655907
11.602	27.8	0.417338
	Average	1.35883
	N	104
	Standard error	0.0754389
	Median	1.20829
