# Supplementary material for: Oscillatory movement of a dynein-microtubule complex crosslinked with DNA origami
Source: eLife. 2022 Jun 24;11:e76357. doi: 10.7554/eLife.76357 (PMC9232216; doi:10.7554/eLife.76357)
Supplement: Figure 4—source data 1. [file elife-76357-fig4-data1.xlsx]

## Sheet: Sheet1
Numerical data for Figure 4 - figure supplement 2 - tilt angles of DNA origami rods
(-) ATP			(+) ATP				Distribution
angle to MTs (deg)	θ (angle to perpendicular) (deg)		angle to MTs (deg)	θ (angle to perpendicular) (deg)			Range	Count (-) ATP	Count (+) ATP	Percentage (-) ATP	Percentage (+) ATP
38.647	51.353		23.534	66.466			0< θ ≤5	75	31	23.1481	9.81013
40.815	49.185		31.061	58.939			5< θ ≤10	42	36	12.963	11.3924
42.357	47.643		32.632	57.368			10< θ ≤15	38	25	11.7284	7.91139
43.122	46.878		33.34	56.66			15< θ ≤20	33	34	10.1852	10.7595
45	45		33.342	56.658			20< θ ≤25	30	39	9.25926	12.3418
45.114	44.886		34.037	55.963			25< θ ≤30	17	31	5.24691	9.81013
45.458	44.542		34.2	55.8			30< θ ≤35	28	23	8.64198	7.27848
46.418	43.582		34.992	55.008			35< θ ≤40	19	27	5.8642	8.5443
47.403	42.597		36.284	53.716			40< θ ≤45	21	30	6.48148	9.49367
49.27	40.73		36.757	53.243			45< θ ≤50	10	13	3.08642	4.11392
49.483	40.517		36.975	53.025			50< θ ≤55	7	12	2.16049	3.79747
50.072	39.928		38.533	51.467			55< θ ≤60	3	10	0.925926	3.16456
50.653	39.347		39.005	50.995			60< θ ≤65	1	4	0.308642	1.26582
50.919	39.081		39.261	50.739			65< θ ≤70	0	1	0	0.316456
51.83	38.17		41.474	48.526
52.147	37.853		41.812	48.188			Total	324	316	100	100
53.081	36.919		43.123	46.877
53.569	36.431		43.641	46.359
54.892	35.108		44.629	45.371
55.14	34.86		45.182	44.818
56.376	33.624		45.69	44.31
56.376	33.624		45.848	44.152
56.605	33.395		45.911	44.089
57.589	32.411		45.937	44.063
59.546	30.454		46.048	43.952
59.845	30.155		46.397	43.603
60.782	29.218		46.474	43.526
60.995	29.005		46.837	43.163
61.314	28.686		47.261	42.739
61.75	28.25		48.18	41.82
62.114	27.886		48.251	41.749
62.7	27.3		49.185	40.815
64.767	25.233		49.223	40.777
65.26	24.74		50.571	39.429
65.299	24.701		52.325	37.675
65.99	24.01		52.817	37.183
66.303	23.697		53.543	36.457
68.88	21.12		53.579	36.421
69.444	20.556		54.273	35.727
71.205	18.795		54.525	35.475
71.974	18.026		55.491	34.509
72.249	17.751		56.535	33.465
72.546	17.454		57.192	32.808
72.852	17.148		57.242	32.758
73.301	16.699		57.734	32.266
74.306	15.694		58.245	31.755
75.027	14.973		58.285	31.715
75.141	14.859		58.57	31.43
76.817	13.183		58.643	31.357
77.358	12.642		58.738	31.262
78.355	11.645		59.208	30.792
78.979	11.021		60.025	29.975
79.084	10.916		60.637	29.363
79.397	10.603		60.871	29.129
79.806	10.194		61.673	28.327
79.891	10.109		62.021	27.979
80.393	9.607		62.134	27.866
81.074	8.926		62.18	27.82
81.085	8.915		62.199	27.801
82.255	7.745		63.089	26.911
82.588	7.412		63.435	26.565
83.099	6.901		64.29	25.71
83.418	6.582		64.396	25.604
83.533	6.467		64.703	25.297
84.35	5.65		65.756	24.244
85.491	4.509		65.999	24.001
85.57	4.43		66.161	23.839
85.956	4.044		66.728	23.272
86.055	3.945		67.323	22.677
86.186	3.814		67.62	22.38
86.313	3.687		67.702	22.298
86.357	3.643		68.148	21.852
86.654	3.346		68.52	21.48
86.779	3.221		69.075	20.925
86.84	3.16		69.365	20.635
88.345	1.655		70.239	19.761
88.531	1.469		70.911	19.089
89.366	0.634		71.259	18.741
89.462	0.538		71.294	18.706
89.491	0.509		72.732	17.268
90	0		73.072	16.928
90.999	0.999		73.243	16.757
91.27	1.27		73.55	16.45
91.434	1.434		73.978	16.022
91.444	1.444		74.161	15.839
91.672	1.672		74.932	15.068
91.717	1.717		74.932	15.068
91.824	1.824		75.863	14.137
92.028	2.028		76.248	13.752
92.161	2.161		77.747	12.253
92.564	2.564		78.009	11.991
92.918	2.918		78.221	11.779
92.918	2.918		78.932	11.068
93.366	3.366		79.359	10.641
94.072	4.072		79.808	10.192
94.086	4.086		80.327	9.673
94.495	4.495		81.193	8.807
94.712	4.712		81.431	8.569
94.764	4.764		82.567	7.433
94.801	4.801		82.842	7.158
95.505	5.505		82.875	7.125
95.554	5.554		82.889	7.111
95.604	5.604		83.005	6.995
96.256	6.256		83.033	6.967
96.582	6.582		83.66	6.34
96.601	6.601		83.83	6.17
98.007	8.007		83.945	6.055
98.13	8.13		84.094	5.906
98.259	8.259		84.185	5.815
99.077	9.077		84.207	5.793
99.847	9.847		84.289	5.711
100.033	10.033		84.562	5.438
100.229	10.229		86.1	3.9
102.216	12.216		86.112	3.888
102.529	12.529		86.742	3.258
102.724	12.724		87.125	2.875
103.53	13.53		87.499	2.501
103.955	13.955		88.148	1.852
104.265	14.265		89.292	0.708
105.018	15.018		89.573	0.427
105.367	15.367		89.93	0.07
105.714	15.714		89.941	0.059
106.21	16.21		90.542	0.542
106.39	16.39		91.075	1.075
107.522	17.522		92.784	2.784
108.26	18.26		92.862	2.862
108.538	18.538		92.936	2.936
110.499	20.499		93.052	3.052
110.925	20.925		93.814	3.814
111.12	21.12		93.824	3.824
112.473	22.473		94.11	4.11
112.906	22.906		94.883	4.883
113.228	23.228		95.156	5.156
113.499	23.499		95.44	5.44
114.829	24.829		95.44	5.44
115.151	25.151		95.633	5.633
115.525	25.525		97.083	7.083
116.003	26.003		97.397	7.397
117.824	27.824		98.054	8.054
120.913	30.913		99.162	9.162
121.322	31.322		101.31	11.31
122.142	32.142		101.497	11.497
122.558	32.558		101.665	11.665
124.061	34.061		103.627	13.627
124.281	34.281		104.036	14.036
124.839	34.839		104.036	14.036
125.311	35.311		104.167	14.167
128.039	38.039		104.186	14.186
128.497	38.497		104.525	14.525
130.365	40.365		105.135	15.135
131.987	41.987		105.151	15.151
133.927	43.927		105.654	15.654
136.637	46.637		105.666	15.666
140.142	50.142		105.775	15.775
144.306	54.306		106.876	16.876
50.32	39.68		107.281	17.281
55.061	34.939		107.372	17.372
56.397	33.603		107.967	17.967
58.859	31.141		108.435	18.435
59.883	30.117		110.469	20.469
68.199	21.801		112.077	22.077
70.656	19.344		112.249	22.249
71.565	18.435		112.776	22.776
71.745	18.255		113.341	23.341
73.009	16.991		113.418	23.418
73.223	16.777		114.033	24.033
77.025	12.975		115.316	25.316
78.718	11.282		115.571	25.571
79.939	10.061		115.953	25.953
79.977	10.023		116.565	26.565
80.114	9.886		116.705	26.705
82.641	7.359		117.603	27.603
85.199	4.801		118.067	28.067
85.601	4.399		118.987	28.987
86.424	3.576		119.19	29.19
86.53	3.47		119.387	29.387
86.532	3.468		119.436	29.436
86.558	3.442		120.457	30.457
87.51	2.49		120.482	30.482
89.064	0.936		120.75	30.75
89.091	0.909		122.905	32.905
90	0		123.274	33.274
90	0		123.517	33.517
91.931	1.931		123.9	33.9
92.49	2.49		126.491	36.491
92.862	2.862		126.68	36.68
93.066	3.066		126.929	36.929
93.366	3.366		127.284	37.284
93.434	3.434		127.294	37.294
94.316	4.316		128.946	38.946
94.399	4.399		129.043	39.043
94.614	4.614		129.99	39.99
94.908	4.908		131.285	41.285
96.715	6.715		131.478	41.478
97.326	7.326		132.173	42.173
98.344	8.344		132.679	42.679
98.973	8.973		133.048	43.048
99.386	9.386		134.215	44.215
99.921	9.921		134.838	44.838
101.889	11.889		134.96	44.96
102.995	12.995		136.381	46.381
103.686	13.686		136.736	46.736
104.12	14.12		137.316	47.316
104.226	14.226		138.576	48.576
104.945	14.945		140.223	50.223
106.861	16.861		140.308	50.308
106.981	16.981		141.45	51.45
107.103	17.103		142.552	52.552
107.879	17.879		145.848	55.848
110.171	20.171		42.094	47.906
112.834	22.834		74.823	15.177
113.416	23.416		78.965	11.035
113.77	23.77		80.879	9.121
113.904	23.904		81.487	8.513
114.877	24.877		85.021	4.979
116.311	26.311		85.236	4.764
119.025	29.025		87.287	2.713
123.428	33.428		87.845	2.155
124.144	34.144		87.851	2.149
125.392	35.392		90.214	0.214
127.705	37.705		94.274	4.274
127.747	37.747		95.566	5.566
130.176	40.176		96.077	6.077
130.176	40.176		96.207	6.207
130.745	40.745		97.921	7.921
131.996	41.996		99.246	9.246
135	45		102.351	12.351
135.113	45.113		102.659	12.659
135.5	45.5		103.875	13.875
136.904	46.904		104.036	14.036
139.17	49.17		104.371	14.371
140.77	50.77		106.174	16.174
145.904	55.904		106.2	16.2
39.902	50.098		106.646	16.646
45.668	44.332		107.663	17.663
47.337	42.663		108.435	18.435
48.686	41.314		109.157	19.157
50.262	39.738		109.314	19.314
52.125	37.875		110.227	20.227
52.74	37.26		110.49	20.49
55.58	34.42		110.637	20.637
56.414	33.586		110.861	20.861
58.396	31.604		110.915	20.915
64.869	25.131		111.016	21.016
68.185	21.815		111.636	21.636
70.387	19.613		111.682	21.682
71.172	18.828		111.835	21.835
72.054	17.946		112.402	22.402
75.494	14.506		112.537	22.537
75.918	14.082		112.914	22.914
76.235	13.765		113.282	23.282
76.762	13.238		113.88	23.88
76.993	13.007		114.244	24.244
79.702	10.298		116.823	26.823
80.123	9.877		118.408	28.408
80.165	9.835		118.524	28.524
80.181	9.819		119.862	29.862
81.228	8.772		119.883	29.883
81.257	8.743		120.103	30.103
81.961	8.039		120.379	30.379
81.989	8.011		120.575	30.575
83.548	6.452		122.538	32.538
83.61	6.39		125.688	35.688
84.082	5.918		125.727	35.727
85.131	4.869		126.54	36.54
85.362	4.638		128.202	38.202
85.783	4.217		128.304	38.304
86.455	3.545		128.404	38.404
88.009	1.991		129.461	39.461
89.031	0.969		129.903	39.903
89.445	0.555		130.535	40.535
89.77	0.23		132.114	42.114
89.907	0.093		132.213	42.213
90.201	0.201		133.245	43.245
90.712	0.712		133.73	43.73
90.885	0.885		133.995	43.995
92.296	2.296		134.341	44.341
92.322	2.322		135.353	45.353
93.566	3.566		136.037	46.037
93.58	3.58		139.626	49.626
93.995	3.995		140.916	50.916
94.512	4.512		148.972	58.972
94.851	4.851		150.709	60.709
95.87	5.87		152.639	62.639
97.253	7.253		30.461	59.539
98.973	8.973		54.48	35.52
99.734	9.734		69.09	20.91
100.317	10.317		69.981	20.019
100.82	10.82		70.923	19.077
101.655	11.655		74.448	15.552
103.606	13.606		75.842	14.158
105.21	15.21		79.47	10.53
106.551	16.551		80.416	9.584
107.354	17.354		80.538	9.462
108.283	18.283		81.261	8.739
108.435	18.435		84.382	5.618
108.893	18.893		85.284	4.716
110.298	20.298		89.831	0.169
110.856	20.856		92.088	2.088
111.075	21.075		92.207	2.207
112.703	22.703		107.485	17.485
113.601	23.601		109.763	19.763
114.55	24.55		110.041	20.041
114.573	24.573		111.308	21.308
114.706	24.706		111.316	21.316
116.565	26.565		114.918	24.918
118.177	28.177		115.32	25.32
118.325	28.325		116.921	26.921
121.248	31.248		120.719	30.719
122.839	32.839		126.165	36.165
123.232	33.232		126.64	36.64
123.362	33.362		126.987	36.987
123.377	33.377		134.97	44.97
127.956	37.956		140.94	50.94
130.005	40.005		153.273	63.273
130.393	40.393		155.963	65.963
134.085	44.085
135.394	45.394		Average	25.6774
136.262	46.262		N	316
142.229	52.229
142.503	52.503
146.821	56.821
149.632	59.632
154.747	64.747
Average	19.513
N	324
