# Supplementary material for: Oscillatory movement of a dynein-microtubule complex crosslinked with DNA origami
Source: eLife. 2022 Jun 24;11:e76357. doi: 10.7554/eLife.76357 (PMC9232216; doi:10.7554/eLife.76357)
Supplement: Figure 4—source data 2. [file elife-76357-fig4-data2.xlsx]

## Sheet: tilt (worksheet)清書
Numerical data for Figure 4 - figure supplement 2 - Mann-Whitney U-test
																					qa = (N-r) - (Na-ra)		Ua = Na×Nb + (na×(na+1))/2 - Ra			Z0 = (U - E(U)) / Sqrt(V(U))
							(0)	Na=	316												qb = (N-r) - (Nb-rb)		Ub = Na×Nb + (nb×(nb+1))/2 - Rb			E(U) = (Na×Nb) / 2
								Nb=	324																	V(U) = Na×Nb×(N+1) / 12
								N=	640											(4)	Ra+Rb=	102384
																					Na*Nb=	102384	(5)	(5)	(5)		(6)	(7)
																					Ra	Rb	Ua	Ub	U		Z0	p	α
																					39600	62784	112870	42164	42164		-3.86044	0.0001	0.002
								(1)							(2)
								group sorted							total sorted					(3)	calculation								conclusion:	There is a difference in the two groups
								A：(+)ATP	ra	index	B：(-)ATP	rb	index		total	ra or rb	index	r			qa(x)	qb(x)				(6)
								0.059	1	a	0	1	b		0	1	b	1				316				E(U) =	51192
								0.07	2	a	0	2	b		0	2	b	2				316				V(U) =	5469012
								0.169	3	a	0	3	b		0	3	b	3				316
								0.214	4	a	0.093	4	b		0.059	1	a	4			321
								0.427	5	a	0.201	5	b		0.07	2	a	5			321
								0.542	6	a	0.23	6	b		0.093	4	b	6				314
								0.708	7	a	0.509	7	b		0.169	3	a	7			320
								1.075	8	a	0.538	8	b		0.201	5	b	8				313
								1.852	9	a	0.555	9	b		0.214	4	a	9			319
								2.088	10	a	0.634	10	b		0.23	6	b	10				312
								2.149	11	a	0.712	11	b		0.427	5	a	11			318
								2.155	12	a	0.885	12	b		0.509	7	b	12				311
								2.207	13	a	0.909	13	b		0.538	8	b	13				311
								2.501	14	a	0.936	14	b		0.542	6	a	14			316
								2.713	15	a	0.969	15	b		0.555	9	b	15				310
								2.784	16	a	0.999	16	b		0.634	10	b	16				310
								2.862	17	a	1.27	17	b		0.708	7	a	17			314
								2.875	18	a	1.434	18	b		0.712	11	b	18				309
								2.936	19	a	1.444	19	b		0.885	12	b	19				309
								3.052	20	a	1.469	20	b		0.909	13	b	20				309
								3.258	21	a	1.655	21	b		0.936	14	b	21				309
								3.814	22	a	1.672	22	b		0.969	15	b	22				309
								3.824	23	a	1.717	23	b		0.999	16	b	23				309
								3.888	24	a	1.824	24	b		1.075	8	a	24			308
								3.9	25	a	1.931	25	b		1.27	17	b	25				308
								4.11	26	a	1.991	26	b		1.434	18	b	26				308
								4.274	27	a	2.028	27	b		1.444	19	b	27				308
								4.716	28	a	2.161	28	b		1.469	20	b	28				308
								4.764	29	a	2.296	29	b		1.655	21	b	29				308
								4.883	30	a	2.322	30	b		1.672	22	b	30				308
								4.979	31	a	2.49	31	b		1.717	23	b	31				308
								5.156	32	a	2.49	32	b		1.824	24	b	32				308
								5.438	33	a	2.564	33	b		1.852	9	a	33			300
								5.44	34	a	2.862	34	b		1.931	25	b	34				307
								5.44	35	a	2.918	35	b		1.991	26	b	35				307
								5.566	36	a	2.918	36	b		2.028	27	b	36				307
								5.618	37	a	3.066	37	b		2.088	10	a	37			297
								5.633	38	a	3.16	38	b		2.149	11	a	38			297
								5.711	39	a	3.221	39	b		2.155	12	a	39			297
								5.793	40	a	3.346	40	b		2.161	28	b	40				304
								5.815	41	a	3.366	41	b		2.207	13	a	41			296
								5.906	42	a	3.366	42	b		2.296	29	b	42				303
								6.055	43	a	3.434	43	b		2.322	30	b	43				303
								6.077	44	a	3.442	44	b		2.49	31	b	44				303
								6.17	45	a	3.468	45	b		2.49	32	b	45				303
								6.207	46	a	3.47	46	b		2.501	14	a	46			292
								6.34	47	a	3.545	47	b		2.564	33	b	47				302
								6.967	48	a	3.566	48	b		2.713	15	a	48			291
								6.995	49	a	3.576	49	b		2.784	16	a	49			291
								7.083	50	a	3.58	50	b		2.862	17	a	50			291
								7.111	51	a	3.643	51	b		2.862	34	b	51				299
								7.125	52	a	3.687	52	b		2.875	18	a	52			290
								7.158	53	a	3.814	53	b		2.918	35	b	53				298
								7.397	54	a	3.945	54	b		2.918	36	b	54				298
								7.433	55	a	3.995	55	b		2.936	19	a	55			288
								7.921	56	a	4.044	56	b		3.052	20	a	56			288
								8.054	57	a	4.072	57	b		3.066	37	b	57				296
								8.513	58	a	4.086	58	b		3.16	38	b	58				296
								8.569	59	a	4.217	59	b		3.221	39	b	59				296
								8.739	60	a	4.316	60	b		3.258	21	a	60			285
								8.807	61	a	4.399	61	b		3.346	40	b	61				295
								9.121	62	a	4.399	62	b		3.366	41	b	62				295
								9.162	63	a	4.43	63	b		3.366	42	b	63				295
								9.246	64	a	4.495	64	b		3.434	43	b	64				295
								9.462	65	a	4.509	65	b		3.442	44	b	65				295
								9.584	66	a	4.512	66	b		3.468	45	b	66				295
								9.673	67	a	4.614	67	b		3.47	46	b	67				295
								10.192	68	a	4.638	68	b		3.545	47	b	68				295
								10.53	69	a	4.712	69	b		3.566	48	b	69				295
								10.641	70	a	4.764	70	b		3.576	49	b	70				295
								11.035	71	a	4.801	71	b		3.58	50	b	71				295
								11.068	72	a	4.801	72	b		3.643	51	b	72				295
								11.31	73	a	4.851	73	b		3.687	52	b	73				295
								11.497	74	a	4.869	74	b		3.814	22	a	74			272
								11.665	75	a	4.908	75	b		3.814	53	b	75				294
								11.779	76	a	5.505	76	b		3.824	23	a	76			271
								11.991	77	a	5.554	77	b		3.888	24	a	77			271
								12.253	78	a	5.604	78	b		3.9	25	a	78			271
								12.351	79	a	5.65	79	b		3.945	54	b	79				291
								12.659	80	a	5.87	80	b		3.995	55	b	80				291
								13.627	81	a	5.918	81	b		4.044	56	b	81				291
								13.752	82	a	6.256	82	b		4.072	57	b	82				291
								13.875	83	a	6.39	83	b		4.086	58	b	83				291
								14.036	84	a	6.452	84	b		4.11	26	a	84			266
								14.036	85	a	6.467	85	b		4.217	59	b	85				290
								14.036	86	a	6.582	86	b		4.274	27	a	86			265
								14.137	87	a	6.582	87	b		4.316	60	b	87				289
								14.158	88	a	6.601	88	b		4.399	61	b	88				289
								14.167	89	a	6.715	89	b		4.399	62	b	89				289
								14.186	90	a	6.901	90	b		4.43	63	b	90				289
								14.371	91	a	7.253	91	b		4.495	64	b	91				289
								14.525	92	a	7.326	92	b		4.509	65	b	92				289
								15.068	93	a	7.359	93	b		4.512	66	b	93				289
								15.068	94	a	7.412	94	b		4.614	67	b	94				289
								15.135	95	a	7.745	95	b		4.638	68	b	95				289
								15.151	96	a	8.007	96	b		4.712	69	b	96				289
								15.177	97	a	8.011	97	b		4.716	28	a	97			255
								15.552	98	a	8.039	98	b		4.764	29	a	98			255
								15.654	99	a	8.13	99	b		4.764	70	b	99				287
								15.666	100	a	8.259	100	b		4.801	71	b	100				287
								15.775	101	a	8.344	101	b		4.801	72	b	101				287
								15.839	102	a	8.743	102	b		4.851	73	b	102				287
								16.022	103	a	8.772	103	b		4.869	74	b	103				287
								16.174	104	a	8.915	104	b		4.883	30	a	104			250
								16.2	105	a	8.926	105	b		4.908	75	b	105				286
								16.45	106	a	8.973	106	b		4.979	31	a	106			249
								16.646	107	a	8.973	107	b		5.156	32	a	107			249
								16.757	108	a	9.077	108	b		5.438	33	a	108			249
								16.876	109	a	9.386	109	b		5.44	34	a	109			249
								16.928	110	a	9.607	110	b		5.44	35	a	110			249
								17.268	111	a	9.734	111	b		5.505	76	b	111				281
								17.281	112	a	9.819	112	b		5.554	77	b	112				281
								17.372	113	a	9.835	113	b		5.566	36	a	113			247
								17.485	114	a	9.847	114	b		5.604	78	b	114				280
								17.663	115	a	9.877	115	b		5.618	37	a	115			246
								17.967	116	a	9.886	116	b		5.633	38	a	116			246
								18.435	117	a	9.921	117	b		5.65	79	b	117				278
								18.435	118	a	10.023	118	b		5.711	39	a	118			245
								18.706	119	a	10.033	119	b		5.793	40	a	119			245
								18.741	120	a	10.061	120	b		5.815	41	a	120			245
								19.077	121	a	10.109	121	b		5.87	80	b	121				275
								19.089	122	a	10.194	122	b		5.906	42	a	122			244
								19.157	123	a	10.229	123	b		5.918	81	b	123				274
								19.314	124	a	10.298	124	b		6.055	43	a	124			243
								19.761	125	a	10.317	125	b		6.077	44	a	125			243
								19.763	126	a	10.603	126	b		6.17	45	a	126			243
								20.019	127	a	10.82	127	b		6.207	46	a	127			243
								20.041	128	a	10.916	128	b		6.256	82	b	128				270
								20.227	129	a	11.021	129	b		6.34	47	a	129			242
								20.469	130	a	11.282	130	b		6.39	83	b	130				269
								20.49	131	a	11.645	131	b		6.452	84	b	131				269
								20.635	132	a	11.655	132	b		6.467	85	b	132				269
								20.637	133	a	11.889	133	b		6.582	86	b	133				269
								20.861	134	a	12.216	134	b		6.582	87	b	134				269
								20.91	135	a	12.529	135	b		6.601	88	b	135				269
								20.915	136	a	12.642	136	b		6.715	89	b	136				269
								20.925	137	a	12.724	137	b		6.901	90	b	137				269
								21.016	138	a	12.975	138	b		6.967	48	a	138			234
								21.308	139	a	12.995	139	b		6.995	49	a	139			234
								21.316	140	a	13.007	140	b		7.083	50	a	140			234
								21.48	141	a	13.183	141	b		7.111	51	a	141			234
								21.636	142	a	13.238	142	b		7.125	52	a	142			234
								21.682	143	a	13.53	143	b		7.158	53	a	143			234
								21.835	144	a	13.606	144	b		7.253	91	b	144				263
								21.852	145	a	13.686	145	b		7.326	92	b	145				263
								22.077	146	a	13.765	146	b		7.359	93	b	146				263
								22.249	147	a	13.955	147	b		7.397	54	a	147			231
								22.298	148	a	14.082	148	b		7.412	94	b	148				262
								22.38	149	a	14.12	149	b		7.433	55	a	149			230
								22.402	150	a	14.226	150	b		7.745	95	b	150				261
								22.537	151	a	14.265	151	b		7.921	56	a	151			229
								22.677	152	a	14.506	152	b		8.007	96	b	152				260
								22.776	153	a	14.859	153	b		8.011	97	b	153				260
								22.914	154	a	14.945	154	b		8.039	98	b	154				260
								23.272	155	a	14.973	155	b		8.054	57	a	155			226
								23.282	156	a	15.018	156	b		8.13	99	b	156				259
								23.341	157	a	15.21	157	b		8.259	100	b	157				259
								23.418	158	a	15.367	158	b		8.344	101	b	158				259
								23.839	159	a	15.694	159	b		8.513	58	a	159			223
								23.88	160	a	15.714	160	b		8.569	59	a	160			223
								24.001	161	a	16.21	161	b		8.739	60	a	161			223
								24.033	162	a	16.39	162	b		8.743	102	b	162				256
								24.244	163	a	16.551	163	b		8.772	103	b	163				256
								24.244	164	a	16.699	164	b		8.807	61	a	164			221
								24.918	165	a	16.777	165	b		8.915	104	b	165				255
								25.297	166	a	16.861	166	b		8.926	105	b	166				255
								25.316	167	a	16.981	167	b		8.973	106	b	167				255
								25.32	168	a	16.991	168	b		8.973	107	b	168				255
								25.571	169	a	17.103	169	b		9.077	108	b	169				255
								25.604	170	a	17.148	170	b		9.121	62	a	170			216
								25.71	171	a	17.354	171	b		9.162	63	a	171			216
								25.953	172	a	17.454	172	b		9.246	64	a	172			216
								26.565	173	a	17.522	173	b		9.386	109	b	173				252
								26.565	174	a	17.751	174	b		9.462	65	a	174			215
								26.705	175	a	17.879	175	b		9.584	66	a	175			215
								26.823	176	a	17.946	176	b		9.607	110	b	176				250
								26.911	177	a	18.026	177	b		9.673	67	a	177			214
								26.921	178	a	18.255	178	b		9.734	111	b	178				249
								27.603	179	a	18.26	179	b		9.819	112	b	179				249
								27.801	180	a	18.283	180	b		9.835	113	b	180				249
								27.82	181	a	18.435	181	b		9.847	114	b	181				249
								27.866	182	a	18.435	182	b		9.877	115	b	182				249
								27.979	183	a	18.538	183	b		9.886	116	b	183				249
								28.067	184	a	18.795	184	b		9.921	117	b	184				249
								28.327	185	a	18.828	185	b		10.023	118	b	185				249
								28.408	186	a	18.893	186	b		10.033	119	b	186				249
								28.524	187	a	19.344	187	b		10.061	120	b	187				249
								28.987	188	a	19.613	188	b		10.109	121	b	188				249
								29.129	189	a	20.171	189	b		10.192	68	a	189			203
								29.19	190	a	20.298	190	b		10.194	122	b	190				248
								29.363	191	a	20.499	191	b		10.229	123	b	191				248
								29.387	192	a	20.556	192	b		10.298	124	b	192				248
								29.436	193	a	20.856	193	b		10.317	125	b	193				248
								29.862	194	a	20.925	194	b		10.53	69	a	194			199
								29.883	195	a	21.075	195	b		10.603	126	b	195				247
								29.975	196	a	21.12	196	b		10.641	70	a	196			198
								30.103	197	a	21.12	197	b		10.82	127	b	197				246
								30.379	198	a	21.801	198	b		10.916	128	b	198				246
								30.457	199	a	21.815	199	b		11.021	129	b	199				246
								30.482	200	a	22.473	200	b		11.035	71	a	200			195
								30.575	201	a	22.703	201	b		11.068	72	a	201			195
								30.719	202	a	22.834	202	b		11.282	130	b	202				244
								30.75	203	a	22.906	203	b		11.31	73	a	203			194
								30.792	204	a	23.228	204	b		11.497	74	a	204			194
								31.262	205	a	23.416	205	b		11.645	131	b	205				242
								31.357	206	a	23.499	206	b		11.655	132	b	206				242
								31.43	207	a	23.601	207	b		11.665	75	a	207			192
								31.715	208	a	23.697	208	b		11.779	76	a	208			192
								31.755	209	a	23.77	209	b		11.889	133	b	209				240
								32.266	210	a	23.904	210	b		11.991	77	a	210			191
								32.538	211	a	24.01	211	b		12.216	134	b	211				239
								32.758	212	a	24.55	212	b		12.253	78	a	212			190
								32.808	213	a	24.573	213	b		12.351	79	a	213			190
								32.905	214	a	24.701	214	b		12.529	135	b	214				237
								33.274	215	a	24.706	215	b		12.642	136	b	215				237
								33.465	216	a	24.74	216	b		12.659	80	a	216			188
								33.517	217	a	24.829	217	b		12.724	137	b	217				236
								33.9	218	a	24.877	218	b		12.975	138	b	218				236
								34.509	219	a	25.131	219	b		12.995	139	b	219				236
								35.475	220	a	25.151	220	b		13.007	140	b	220				236
								35.52	221	a	25.233	221	b		13.183	141	b	221				236
								35.688	222	a	25.525	222	b		13.238	142	b	222				236
								35.727	223	a	26.003	223	b		13.53	143	b	223				236
								35.727	224	a	26.311	224	b		13.606	144	b	224				236
								36.165	225	a	26.565	225	b		13.627	81	a	225			180
								36.421	226	a	27.3	226	b		13.686	145	b	226				235
								36.457	227	a	27.824	227	b		13.752	82	a	227			179
								36.491	228	a	27.886	228	b		13.765	146	b	228				234
								36.54	229	a	28.177	229	b		13.875	83	a	229			178
								36.64	230	a	28.25	230	b		13.955	147	b	230				233
								36.68	231	a	28.325	231	b		14.036	84	a	231			177
								36.929	232	a	28.686	232	b		14.036	85	a	232			177
								36.987	233	a	29.005	233	b		14.036	86	a	233			177
								37.183	234	a	29.025	234	b		14.082	148	b	234				230
								37.284	235	a	29.218	235	b		14.12	149	b	235				230
								37.294	236	a	30.117	236	b		14.137	87	a	236			175
								37.675	237	a	30.155	237	b		14.158	88	a	237			175
								38.202	238	a	30.454	238	b		14.167	89	a	238			175
								38.304	239	a	30.913	239	b		14.186	90	a	239			175
								38.404	240	a	31.141	240	b		14.226	150	b	240				226
								38.946	241	a	31.248	241	b		14.265	151	b	241				226
								39.043	242	a	31.322	242	b		14.371	91	a	242			173
								39.429	243	a	31.604	243	b		14.506	152	b	243				225
								39.461	244	a	32.142	244	b		14.525	92	a	244			172
								39.903	245	a	32.411	245	b		14.859	153	b	245				224
								39.99	246	a	32.558	246	b		14.945	154	b	246				224
								40.535	247	a	32.839	247	b		14.973	155	b	247				224
								40.777	248	a	33.232	248	b		15.018	156	b	248				224
								40.815	249	a	33.362	249	b		15.068	93	a	249			168
								41.285	250	a	33.377	250	b		15.068	94	a	250			168
								41.478	251	a	33.395	251	b		15.135	95	a	251			168
								41.749	252	a	33.428	252	b		15.151	96	a	252			168
								41.82	253	a	33.586	253	b		15.177	97	a	253			168
								42.114	254	a	33.603	254	b		15.21	157	b	254				219
								42.173	255	a	33.624	255	b		15.367	158	b	255				219
								42.213	256	a	33.624	256	b		15.552	98	a	256			166
								42.679	257	a	34.061	257	b		15.654	99	a	257			166
								42.739	258	a	34.144	258	b		15.666	100	a	258			166
								43.048	259	a	34.281	259	b		15.694	159	b	259				216
								43.163	260	a	34.42	260	b		15.714	160	b	260				216
								43.245	261	a	34.839	261	b		15.775	101	a	261			164
								43.526	262	a	34.86	262	b		15.839	102	a	262			164
								43.603	263	a	34.939	263	b		16.022	103	a	263			164
								43.73	264	a	35.108	264	b		16.174	104	a	264			164
								43.952	265	a	35.311	265	b		16.2	105	a	265			164
								43.995	266	a	35.392	266	b		16.21	161	b	266				211
								44.063	267	a	36.431	267	b		16.39	162	b	267				211
								44.089	268	a	36.919	268	b		16.45	106	a	268			162
								44.152	269	a	37.26	269	b		16.551	163	b	269				210
								44.215	270	a	37.705	270	b		16.646	107	a	270			161
								44.31	271	a	37.747	271	b		16.699	164	b	271				209
								44.341	272	a	37.853	272	b		16.757	108	a	272			160
								44.818	273	a	37.875	273	b		16.777	165	b	273				208
								44.838	274	a	37.956	274	b		16.861	166	b	274				208
								44.96	275	a	38.039	275	b		16.876	109	a	275			158
								44.97	276	a	38.17	276	b		16.928	110	a	276			158
								45.353	277	a	38.497	277	b		16.981	167	b	277				206
								45.371	278	a	39.081	278	b		16.991	168	b	278				206
								46.037	279	a	39.347	279	b		17.103	169	b	279				206
								46.359	280	a	39.68	280	b		17.148	170	b	280				206
								46.381	281	a	39.738	281	b		17.268	111	a	281			154
								46.736	282	a	39.928	282	b		17.281	112	a	282			154
								46.877	283	a	40.005	283	b		17.354	171	b	283				204
								47.316	284	a	40.176	284	b		17.372	113	a	284			153
								47.906	285	a	40.176	285	b		17.454	172	b	285				203
								48.188	286	a	40.365	286	b		17.485	114	a	286			152
								48.526	287	a	40.393	287	b		17.522	173	b	287				202
								48.576	288	a	40.517	288	b		17.663	115	a	288			151
								49.626	289	a	40.73	289	b		17.751	174	b	289				201
								50.223	290	a	40.745	290	b		17.879	175	b	290				201
								50.308	291	a	41.314	291	b		17.946	176	b	291				201
								50.739	292	a	41.987	292	b		17.967	116	a	292			148
								50.916	293	a	41.996	293	b		18.026	177	b	293				200
								50.94	294	a	42.597	294	b		18.255	178	b	294				200
								50.995	295	a	42.663	295	b		18.26	179	b	295				200
								51.45	296	a	43.582	296	b		18.283	180	b	296				200
								51.467	297	a	43.927	297	b		18.435	117	a	297			144
								52.552	298	a	44.085	298	b		18.435	118	a	298			144
								53.025	299	a	44.332	299	b		18.435	181	b	299				198
								53.243	300	a	44.542	300	b		18.435	182	b	300				198
								53.716	301	a	44.886	301	b		18.538	183	b	301				198
								55.008	302	a	45	302	b		18.706	119	a	302			141
								55.8	303	a	45	303	b		18.741	120	a	303			141
								55.848	304	a	45.113	304	b		18.795	184	b	304				196
								55.963	305	a	45.394	305	b		18.828	185	b	305				196
								56.658	306	a	45.5	306	b		18.893	186	b	306				196
								56.66	307	a	46.262	307	b		19.077	121	a	307			138
								57.368	308	a	46.637	308	b		19.089	122	a	308			138
								58.939	309	a	46.878	309	b		19.157	123	a	309			138
								58.972	310	a	46.904	310	b		19.314	124	a	310			138
								59.539	311	a	47.643	311	b		19.344	187	b	311				192
								60.709	312	a	49.17	312	b		19.613	188	b	312				192
								62.639	313	a	49.185	313	b		19.761	125	a	313			136
								63.273	314	a	50.098	314	b		19.763	126	a	314			136
								65.963	315	a	50.142	315	b		20.019	127	a	315			136
								66.466	316	a	50.77	316	b		20.041	128	a	316			136
											51.353	317	b		20.171	189	b	317				188
											52.229	318	b		20.227	129	a	318			135
											52.503	319	b		20.298	190	b	319				187
											54.306	320	b		20.469	130	a	320			134
											55.904	321	b		20.49	131	a	321			134
											56.821	322	b		20.499	191	b	322				185
											59.632	323	b		20.556	192	b	323				185
											64.747	324	b		20.635	132	a	324			132
															20.637	133	a	325			132
															20.856	193	b	326				183
															20.861	134	a	327			131
															20.91	135	a	328			131
															20.915	136	a	329			131
															20.925	137	a	330			131
															20.925	194	b	331				179
															21.016	138	a	332			130
															21.075	195	b	333				178
															21.12	196	b	334				178
															21.12	197	b	335				178
															21.308	139	a	336			127
															21.316	140	a	337			127
															21.48	141	a	338			127
															21.636	142	a	339			127
															21.682	143	a	340			127
															21.801	198	b	341				173
															21.815	199	b	342				173
															21.835	144	a	343			125
															21.852	145	a	344			125
															22.077	146	a	345			125
															22.249	147	a	346			125
															22.298	148	a	347			125
															22.38	149	a	348			125
															22.402	150	a	349			125
															22.473	200	b	350				166
															22.537	151	a	351			124
															22.677	152	a	352			124
															22.703	201	b	353				164
															22.776	153	a	354			123
															22.834	202	b	355				163
															22.906	203	b	356				163
															22.914	154	a	357			121
															23.228	204	b	358				162
															23.272	155	a	359			120
															23.282	156	a	360			120
															23.341	157	a	361			120
															23.416	205	b	362				159
															23.418	158	a	363			119
															23.499	206	b	364				158
															23.601	207	b	365				158
															23.697	208	b	366				158
															23.77	209	b	367				158
															23.839	159	a	368			115
															23.88	160	a	369			115
															23.904	210	b	370				156
															24.001	161	a	371			114
															24.01	211	b	372				155
															24.033	162	a	373			113
															24.244	163	a	374			113
															24.244	164	a	375			113
															24.55	212	b	376				152
															24.573	213	b	377				152
															24.701	214	b	378				152
															24.706	215	b	379				152
															24.74	216	b	380				152
															24.829	217	b	381				152
															24.877	218	b	382				152
															24.918	165	a	383			106
															25.131	219	b	384				151
															25.151	220	b	385				151
															25.233	221	b	386				151
															25.297	166	a	387			103
															25.316	167	a	388			103
															25.32	168	a	389			103
															25.525	222	b	390				148
															25.571	169	a	391			102
															25.604	170	a	392			102
															25.71	171	a	393			102
															25.953	172	a	394			102
															26.003	223	b	395				144
															26.311	224	b	396				144
															26.565	173	a	397			100
															26.565	174	a	398			100
															26.565	225	b	399				142
															26.705	175	a	400			99
															26.823	176	a	401			99
															26.911	177	a	402			99
															26.921	178	a	403			99
															27.3	226	b	404				138
															27.603	179	a	405			98
															27.801	180	a	406			98
															27.82	181	a	407			98
															27.824	227	b	408				135
															27.866	182	a	409			97
															27.886	228	b	410				134
															27.979	183	a	411			96
															28.067	184	a	412			96
															28.177	229	b	413				132
															28.25	230	b	414				132
															28.325	231	b	415				132
															28.327	185	a	416			93
															28.408	186	a	417			93
															28.524	187	a	418			93
															28.686	232	b	419				129
															28.987	188	a	420			92
															29.005	233	b	421				128
															29.025	234	b	422				128
															29.129	189	a	423			90
															29.19	190	a	424			90
															29.218	235	b	425				126
															29.363	191	a	426			89
															29.387	192	a	427			89
															29.436	193	a	428			89
															29.862	194	a	429			89
															29.883	195	a	430			89
															29.975	196	a	431			89
															30.103	197	a	432			89
															30.117	236	b	433				119
															30.155	237	b	434				119
															30.379	198	a	435			87
															30.454	238	b	436				118
															30.457	199	a	437			86
															30.482	200	a	438			86
															30.575	201	a	439			86
															30.719	202	a	440			86
															30.75	203	a	441			86
															30.792	204	a	442			86
															30.913	239	b	443				112
															31.141	240	b	444				112
															31.248	241	b	445				112
															31.262	205	a	446			83
															31.322	242	b	447				111
															31.357	206	a	448			82
															31.43	207	a	449			82
															31.604	243	b	450				109
															31.715	208	a	451			81
															31.755	209	a	452			81
															32.142	244	b	453				107
															32.266	210	a	454			80
															32.411	245	b	455				106
															32.538	211	a	456			79
															32.558	246	b	457				105
															32.758	212	a	458			78
															32.808	213	a	459			78
															32.839	247	b	460				103
															32.905	214	a	461			77
															33.232	248	b	462				102
															33.274	215	a	463			76
															33.362	249	b	464				101
															33.377	250	b	465				101
															33.395	251	b	466				101
															33.428	252	b	467				101
															33.465	216	a	468			72
															33.517	217	a	469			72
															33.586	253	b	470				99
															33.603	254	b	471				99
															33.624	255	b	472				99
															33.624	256	b	473				99
															33.9	218	a	474			68
															34.061	257	b	475				98
															34.144	258	b	476				98
															34.281	259	b	477				98
															34.42	260	b	478				98
															34.509	219	a	479			64
															34.839	261	b	480				97
															34.86	262	b	481				97
															34.939	263	b	482				97
															35.108	264	b	483				97
															35.311	265	b	484				97
															35.392	266	b	485				97
															35.475	220	a	486			58
															35.52	221	a	487			58
															35.688	222	a	488			58
															35.727	223	a	489			58
															35.727	224	a	490			58
															36.165	225	a	491			58
															36.421	226	a	492			58
															36.431	267	b	493				90
															36.457	227	a	494			57
															36.491	228	a	495			57
															36.54	229	a	496			57
															36.64	230	a	497			57
															36.68	231	a	498			57
															36.919	268	b	499				85
															36.929	232	a	500			56
															36.987	233	a	501			56
															37.183	234	a	502			56
															37.26	269	b	503				82
															37.284	235	a	504			55
															37.294	236	a	505			55
															37.675	237	a	506			55
															37.705	270	b	507				79
															37.747	271	b	508				79
															37.853	272	b	509				79
															37.875	273	b	510				79
															37.956	274	b	511				79
															38.039	275	b	512				79
															38.17	276	b	513				79
															38.202	238	a	514			48
															38.304	239	a	515			48
															38.404	240	a	516			48
															38.497	277	b	517				76
															38.946	241	a	518			47
															39.043	242	a	519			47
															39.081	278	b	520				74
															39.347	279	b	521				74
															39.429	243	a	522			45
															39.461	244	a	523			45
															39.68	280	b	524				72
															39.738	281	b	525				72
															39.903	245	a	526			43
															39.928	282	b	527				71
															39.99	246	a	528			42
															40.005	283	b	529				70
															40.176	284	b	530				70
															40.176	285	b	531				70
															40.365	286	b	532				70
															40.393	287	b	533				70
															40.517	288	b	534				70
															40.535	247	a	535			36
															40.73	289	b	536				69
															40.745	290	b	537				69
															40.777	248	a	538			34
															40.815	249	a	539			34
															41.285	250	a	540			34
															41.314	291	b	541				66
															41.478	251	a	542			33
															41.749	252	a	543			33
															41.82	253	a	544			33
															41.987	292	b	545				63
															41.996	293	b	546				63
															42.114	254	a	547			31
															42.173	255	a	548			31
															42.213	256	a	549			31
															42.597	294	b	550				60
															42.663	295	b	551				60
															42.679	257	a	552			29
															42.739	258	a	553			29
															43.048	259	a	554			29
															43.163	260	a	555			29
															43.245	261	a	556			29
															43.526	262	a	557			29
															43.582	296	b	558				54
															43.603	263	a	559			28
															43.73	264	a	560			28
															43.927	297	b	561				52
															43.952	265	a	562			27
															43.995	266	a	563			27
															44.063	267	a	564			27
															44.085	298	b	565				49
															44.089	268	a	566			26
															44.152	269	a	567			26
															44.215	270	a	568			26
															44.31	271	a	569			26
															44.332	299	b	570				45
															44.341	272	a	571			25
															44.542	300	b	572				44
															44.818	273	a	573			24
															44.838	274	a	574			24
															44.886	301	b	575				42
															44.96	275	a	576			23
															44.97	276	a	577			23
															45	302	b	578				40
															45	303	b	579				40
															45.113	304	b	580				40
															45.353	277	a	581			20
															45.371	278	a	582			20
															45.394	305	b	583				38
															45.5	306	b	584				38
															46.037	279	a	585			18
															46.262	307	b	586				37
															46.359	280	a	587			17
															46.381	281	a	588			17
															46.637	308	b	589				35
															46.736	282	a	590			16
															46.877	283	a	591			16
															46.878	309	b	592				33
															46.904	310	b	593				33
															47.316	284	a	594			14
															47.643	311	b	595				32
															47.906	285	a	596			13
															48.188	286	a	597			13
															48.526	287	a	598			13
															48.576	288	a	599			13
															49.17	312	b	600				28
															49.185	313	b	601				28
															49.626	289	a	602			11
															50.098	314	b	603				27
															50.142	315	b	604				27
															50.223	290	a	605			9
															50.308	291	a	606			9
															50.739	292	a	607			9
															50.77	316	b	608				24
															50.916	293	a	609			8
															50.94	294	a	610			8
															50.995	295	a	611			8
															51.353	317	b	612				21
															51.45	296	a	613			7
															51.467	297	a	614			7
															52.229	318	b	615				19
															52.503	319	b	616				19
															52.552	298	a	617			5
															53.025	299	a	618			5
															53.243	300	a	619			5
															53.716	301	a	620			5
															54.306	320	b	621				15
															55.008	302	a	622			4
															55.8	303	a	623			4
															55.848	304	a	624			4
															55.904	321	b	625				12
															55.963	305	a	626			3
															56.658	306	a	627			3
															56.66	307	a	628			3
															56.821	322	b	629				9
															57.368	308	a	630			2
															58.939	309	a	631			2
															58.972	310	a	632			2
															59.539	311	a	633			2
															59.632	323	b	634				5
															60.709	312	a	635			1
															62.639	313	a	636			1
															63.273	314	a	637			1
															64.747	324	b	638				2
															65.963	315	a	639			0
															66.466	316	a	640			0
