# Supplementary material for: Oscillatory movement of a dynein-microtubule complex crosslinked with DNA origami
Source: eLife. 2022 Jun 24;11:e76357. doi: 10.7554/eLife.76357 (PMC9232216; doi:10.7554/eLife.76357)
Supplement: Figure 6—source data 1. [file elife-76357-fig6-data1.xlsx]

## Sheet: Sheet1
Numerical data for Figure 6B, 6C and 6D - Distance, time, and velocitiy									Numerical data for Figure 6E - Frequency				Numerical data for Figure 6F - Step size
	Forwards				Backwards								Forwards	Backwards	Unidirectional
	Distance df (nm)	Time tf (ms)	Velocity vf (µm/s)		Distance Db (nm)	Time tb (ms)	Velocity vb (µm/s)			Frequency (Hz)			Step size (nm)	Step size (nm)	Step size (nm)
	30.3586	37.8	0.803137		-43.764	1.95	-22.4431			24.4			10.9866	-18.8413	-11.3922		Gaussian function used for fitting in Figure 6E, unidirectional movements
	26.305	26.65	0.987054		-44.6344	2.6	-17.1671			39.1			17.507	-9.90533	-9.068		a*exp(-(x-b)^2/(2*c^2))+d*exp(-(x-2b)^2/(4*c^2))+f*exp(-(x-3b)^2/(6*c^2))+g*exp(-(x+b)^2/(2*c^2))+k*exp(-(x+2b)^2/(4*c^2))+l*exp(-(x+3b)^2/(6*c^2))
	28.1381	25.55	1.1013		-11.7676	1.05	-11.2072			7.3			12.7676	-7.50655	-7.83728		Results:	a=46.7, b=6.2, c=2.4, d=10.5, f=0.6, g=7.0, k=-0.5, l=0.2
	15.1972	11.6	1.3101		-72.7525	6.55	-11.1073			9.8			14.4097	-7.30313	-7.37455
	8.23242	6	1.37207		-12.7881	1.4	-9.13433			4.9			11.8953	-11.276	-7.11865		Gaussian function used for fitting in Figure 6E, forwards steps during oscillation.
	22.2478	13.65	1.62987		-26.8252	2.95	-9.09329			19.5			7.98904	-8.14118	-6.80505		a*exp(-(x-b)^2/(2*c^2))+d*exp(-(x-2b)^2/(4*c^2))+f*exp(-(x-3b)^2/(6*c^2))
	33.7939	19.75	1.71108		-9.92326	1.15	-8.62892			29.3			13.419	-10.5731	-5.90638		Results:	a=15.3, b=9.5, c=3.5, d=1.0, f=-0.5
	41.2612	21.25	1.9417		-27.2811	3.85	-7.08601			14.6			13.8836	-8.98293	-5.82567
	35.2916	17.8	1.98268		-18.2575	2.65	-6.88964			48.8			9.75335	-5.8259	-5.74031		Gaussian function used for fitting in Figure 6E, backwards steps during oscillation.
	27.798	13.25	2.09796		-32.9303	5.9	-5.58141			78.1			12.4944	-17.1749	-5.67563		a*exp(-(x-b)^2/(2*c^2))+d*exp(-(x-2b)^2/(4*c^2))+f*exp(-(x-3b)^2/(6*c^2))
	32.394	14	2.31386		-29.7922	6.1	-4.88396			48.8			10.5328	-13.1487	-5.62682		Results:	a=9.6, b=-8.4, c=2.2, d=4.6, f=-0.3
	52.035	22.05	2.35986		-17.0933	3.75	-4.5582			58.6			9.87512	-2.87775	-5.11973
	28.2574	10	2.82574		-15.4156	4.65	-3.31518			102.5			9.95063	-12.4133	-4.97949
	22.6088	7.75	2.91726		-41.0742	15.45	-2.65852			19.5			14.3104	-5.14002	-4.90467
	25.0813	7.05	3.55763		-11.2722	4.4	-2.56186			29.3			11.7493	-19.7677	-4.43058
	27.2716	7.6	3.58837		-27.6972	12.3	-2.25181			48.8			7.73416	-6.01561	-4.24763
	7.16324	1.95	3.67345		-28.7466	14.65	-1.96223			58.6			8.4766	-7.14704	-4.05638
	16.5249	4.45	3.71347		-16.0264	11.25	-1.42457			39.1			9.03938	-17.9887	-3.97773
	33.6762	8.95	3.7627		-23.0008	18.1	-1.27076			29.3			10.7414	-10.5446	-3.72006
	11.6966	3.05	3.83495		-26.0857	27.95	-0.933299			43.9			16.0118	-16.101	-2.31499
	20.6613	5.25	3.93549		-17.5533	25.25	-0.695179			14.6			12.2425	-10.4632	-1.59671
	18.6987	4.75	3.93656							29.3			3.48605	-15.5861	1.21908
	10.1264	2.55	3.97114	Average	-26.4134	8.28095	-6.42161			9.8			13.0389	-11.695	1.40243
	26.4093	6.45	4.09447	N	21	21	21			4.9			11.6835	-7.89609	1.69513
	24.459	5.8	4.21707	Standard error	3.24808	1.7272	1.22861			48.8			7.96062	-12.5494	2.09088
	22.8155	5.3	4.30481	Median	-26.0857	4.65	-4.88396			29.3			11.5016	-8.91871	2.19783
	31.1458	6.65	4.68357							24.4			3.88509	-5.41559	2.39812
	12.5404	2.6	4.82324							19.5			4.94574	-19.1362	2.59541
	26.8051	5.5	4.87365							19.5			16.4816	-18.8365	2.60716
	19.7721	3.55	5.56959										6.96324	-7.32572	2.82048
	43.1977	7.75	5.57389						Average	32.9069			10.922	-9.76755	2.83756
	28.2543	4.75	5.94828						N	29			9.72503	-9.66901	2.96807
	14.0464	1.9	7.39286						Standard error	4.19729			10.5388	-11.9013	3.03145
	50.8931	5.3	9.60246										18.2129	-19.5039	3.03816
	55.3264	5.1	10.8483										12.4163	-11.9284	3.04094
													20.7501	-17.8782	3.16381
Average	26.5853	10.0957	3.75028										13.0053	-13.9574	3.20191
N	35	35	35										11.9962	-7.38745	3.52244
Standard error	2.00926	1.41193	0.379919										9.57475	-8.02816	3.66595
Median	26.4093	6.65	3.71347										12.3314	-8.49455	3.66729
													5.94831	-6.27997	3.71711
													6.12567	-15.0177	3.81103
													7.98858	-13.1867	3.85925
													17.4346	-13.6385	3.95193
													9.37052		4.03449
													6.8361		4.08763
													3.23924		4.10379
													6.79411		4.11227
													7.88225		4.14446
													9.47224		4.19657
													17.811		4.28186
													10.3198		4.38955
													8.48924		4.44245
													8.98894		4.48488
													5.43555		4.50998
													9.76161		4.54282
													9.30063		4.56783
													9.39805		4.60921
													4.37971		4.67917
													3.31217		4.77755
													4.75357		4.78992
													9.2853		4.89009
													6.40735		5.07671
													14.3748		5.09668
													8.23394		5.14361
													7.37498		5.19362
													6.30724		5.22198
													10.7768		5.31171
													12.8425		5.32665
													9.97299		5.34046
													3.48536		5.35432
													4.74705		5.3566
															5.38489
															5.40438
															5.45772
															5.52731
															5.53857
															5.55512
															5.57397
															5.75333
															5.89788
															5.91182
															5.93636
															5.94014
															5.94492
															5.95274
															6.07443
															6.11585
															6.11764
															6.15803
															6.16217
															6.20091
															6.2059
															6.21271
															6.21466
															6.25498
															6.37632
															6.37657
															6.41332
															6.48184
															6.48703
															6.53161
															6.55859
															6.60027
															6.60786
															6.64039
															6.72338
															6.74786
															6.75647
															6.75824
															6.77863
															6.78908
															6.80853
															6.96505
															7.0842
															7.12502
															7.17547
															7.24585
															7.25208
															7.25851
															7.30184
															7.30832
															7.36472
															7.41005
															7.46607
															7.48607
															7.51192
															7.5443
															7.57218
															7.75813
															7.75901
															7.86818
															7.87188
															7.89894
															8.08383
															8.12279
															8.24496
															8.35001
															8.45278
															8.45889
															8.5556
															8.5579
															8.66818
															8.76024
															8.76587
															8.79801
															8.82935
															8.88447
															8.96518
															9.0474
															9.12357
															9.14598
															9.15219
															9.16188
															9.18394
															9.18983
															9.21799
															9.21801
															9.31664
															9.32453
															9.59651
															9.60633
															9.62231
															9.65639
															9.79145
															9.94435
															10.0582
															10.1009
															10.104
															10.3252
															10.5004
															10.5138
															10.5489
															10.6917
															10.7899
															10.8346
															10.841
															10.8741
															11.0939
															11.1092
															11.11
															11.2322
															11.4011
															11.9795
															11.9901
															12.4501
															12.7339
															13.0288
															13.0356
															13.213
															13.2687
															13.4592
															13.9232
															14.162
															14.282
															14.32
															14.6004
															14.8215
															15.2757
															15.5357
															15.8899
															15.9946
															16.2021
															16.6681
															17.5709
															17.7018
															18.6005
															18.8284
															19.084
															19.1248
															28.1632
												N	72	44	211
