# Supplementary material for: Oscillatory movement of a dynein-microtubule complex crosslinked with DNA origami
Source: eLife. 2022 Jun 24;11:e76357. doi: 10.7554/eLife.76357 (PMC9232216; doi:10.7554/eLife.76357)
Supplement: Figure 7—source data 1. [file elife-76357-fig7-data1.xlsx]

## Sheet: Sheet1
Numerical data for Figure 7A - sliding of the MTs in a dynein-MT complex in which dyneins are arranged unidirectionally
Travelled distance (µm)	Time for measurement (sec)	Velocity (µm/sec)
4.145	0.3	13.8167
2.067	0.3	6.89
2.802	0.2	14.01
1.964	0.3	6.54667
2.364	0.2	11.82
2.191	0.3	7.30333
2.141	0.3	7.13667
1.426	0.3	4.75333
3.605	0.3	12.0167
1.684	0.3	5.61333
1.96	0.3	6.53333
2.155	0.3	7.18333
5.246	0.3	17.4867
4.461	0.3	14.87
1.573	0.3	5.24333
2.201	0.3	7.33667
2.052	0.3	6.84
2.036	0.3	6.78667
2.045	0.3	6.81667
0.833	0.3	2.77667
0.531	0.3	1.77
0.884	0.3	2.94667
0.907	0.3	3.02333
3.083	0.3	10.2767
2.48	0.3	8.26667
1.188	0.3	3.96
3.11	0.3	10.3667
4.2	0.3	14
1.002	0.3	3.34
2.939	0.3	9.79667
3.26	0.3	10.8667
1.666	0.3	5.55333
2.23	0.3	7.43333
4.865	0.3	16.2167
1.796	0.3	5.98667
4.022	0.3	13.4067
2.395	0.3	7.98333
2.963	0.3	9.87667
2.801	0.2	14.005
1.428	0.3	4.76
4.565	0.3	15.2167
3.391	0.3	11.3033
2.34	0.3	7.8
2.085	0.3	6.95
2.02	0.3	6.73333
1.402	0.3	4.67333
1.23	0.3	4.1
0.954	0.3	3.18
0.627	0.3	2.09
0.533	0.3	1.77667
1.2	0.3	4
0.863	0.3	2.87667
0.759	0.3	2.53
0.569	0.3	1.89667
0.804	0.3	2.68
1.088	0.3	3.62667
0.394	0.3	1.31333
0.981	0.3	3.27
0.687	0.3	2.29
0.882	0.3	2.94
0.874	0.3	2.91333
0.746	0.3	2.48667
1.529	0.3	5.09667
0.55	0.3	1.83333
0.362	0.3	1.20667
	Average	6.77536
	N	65
	Standard error	0.529451
	Median	6.53333
